# Supplementary material
Source: publisher figshare collection journal article supplement (https://acs.figshare.com/ndownloader/files/4766572)
Supplement: Supplementary file 1 [file 4766572]

 
data_dt0988m 
 
_audit_creation_method            SHELXL-97 
_chemical_name_systematic 
; 
 ? 
; 
_chemical_name_common             ? 
_chemical_melting_point           ? 
_chemical_formula_moiety          ? 
_chemical_formula_sum 
 'C21 H20 Br N O2' 
_chemical_formula_weight          398.29 
 
loop_ 
 _atom_type_symbol 
 _atom_type_description 
 _atom_type_scat_dispersion_real 
 _atom_type_scat_dispersion_imag 
 _atom_type_scat_source 
 'C'  'C'   0.0033   0.0016 
 'International Tables Vol C Tables 4.2.6.8 and 6.1.1.4' 
 'H'  'H'   0.0000   0.0000 
 'International Tables Vol C Tables 4.2.6.8 and 6.1.1.4' 
 'N'  'N'   0.0061   0.0033 
 'International Tables Vol C Tables 4.2.6.8 and 6.1.1.4' 
 'O'  'O'   0.0106   0.0060 
 'International Tables Vol C Tables 4.2.6.8 and 6.1.1.4' 
 'Br'  'Br'  -0.2901   2.4595 
 'International Tables Vol C Tables 4.2.6.8 and 6.1.1.4' 
 
_symmetry_cell_setting            'ORTHORHOMBIC'  
_symmetry_space_group_name_H-M    'Pbca' 
 
loop_ 
 _symmetry_equiv_pos_as_xyz 
 'x, y, z' 
 '-x+1/2, -y, z+1/2' 
 '-x, y+1/2, -z+1/2' 
 'x+1/2, -y+1/2, -z' 
 '-x, -y, -z' 
 'x-1/2, y, -z-1/2' 
 'x, -y-1/2, z-1/2' 
 '-x-1/2, y-1/2, z' 
 
_cell_length_a                    8.8752(10) 
_cell_length_b                    17.898(2) 
_cell_length_c                    24.410(3) 
_cell_angle_alpha                 90.00 
_cell_angle_beta                  90.00 
_cell_angle_gamma                 90.00 
_cell_volume                      3877.4(8) 
_cell_formula_units_Z             8 
_cell_measurement_temperature     293(2) 
_cell_measurement_reflns_used     ? 
_cell_measurement_theta_min       ? 
_cell_measurement_theta_max       ? 
 
_exptl_crystal_description        PLATE 
_exptl_crystal_colour             COLOURLESS 
_exptl_crystal_size_max           0.57  
_exptl_crystal_size_mid           0.38  
_exptl_crystal_size_min           0.19  
_exptl_crystal_density_meas       ? 
_exptl_crystal_density_diffrn     1.365 
_exptl_crystal_density_method     'not measured' 
_exptl_crystal_F_000              1632 
_exptl_absorpt_coefficient_mu     2.133 
_exptl_absorpt_correction_type    'SADABS' 
_exptl_absorpt_correction_T_min   ? 
_exptl_absorpt_correction_T_max   ? 
_exptl_absorpt_process_details    ? 
 
_exptl_special_details 
; 
 ? 
; 
 
_diffrn_ambient_temperature       293(2) 
_diffrn_radiation_wavelength      0.71073 
_diffrn_radiation_type            MoK\a 
_diffrn_radiation_source          'fine-focus sealed tube' 
_diffrn_radiation_monochromator   graphite 
_diffrn_measurement_device_type   'BRUKER SMART CCD AREA DETECTOR' 
_diffrn_measurement_method        'PHI-OMEGA' 
_diffrn_detector_area_resol_mean  0.3  
_diffrn_standards_number          ? 
_diffrn_standards_interval_count  ? 
_diffrn_standards_interval_time   ? 
_diffrn_standards_decay_%         <10  
_diffrn_reflns_number             14436 
_diffrn_reflns_av_R_equivalents   0.0360 
_diffrn_reflns_av_sigmaI/netI     0.0302 
_diffrn_reflns_limit_h_min        -9 
_diffrn_reflns_limit_h_max        9 
_diffrn_reflns_limit_k_min        -19 
_diffrn_reflns_limit_k_max        18 
_diffrn_reflns_limit_l_min        -16 
_diffrn_reflns_limit_l_max        26 
_diffrn_reflns_theta_min          2.28 
_diffrn_reflns_theta_max          22.50 
_reflns_number_total              2533 
_reflns_number_gt                 2152 
_reflns_threshold_expression      >2sigma(I) 
 
_computing_data_collection        'BRUKER AXS SMART 3'
_computing_cell_refinement        'BRUKER AXS SMART 3' 
_computing_data_reduction         'BRUKER AXS SMART 3' 
_computing_structure_solution     'SHELXS-97 (Sheldrick, 1990)' 
_computing_structure_refinement   'SHELXL-97 (Sheldrick, 1997)' 
_computing_molecular_graphics     'PLATON; 'MERCURY 1.2' 
_computing_publication_material   ? 
 
_refine_special_details 
; 
 Refinement of F^2^ against ALL reflections.  The weighted R-factor wR and 
 goodness of fit S are based on F^2^, conventional R-factors R are based 
 on F, with F set to zero for negative F^2^. The threshold expression of 
 F^2^ > 2sigma(F^2^) is used only for calculating R-factors(gt) etc. and is 
 not relevant to the choice of reflections for refinement.  R-factors based 
 on F^2^ are statistically about twice as large as those based on F, and R- 
 factors based on ALL data will be even larger. 
; 
 
_refine_ls_structure_factor_coef  Fsqd  
_refine_ls_matrix_type            full 
_refine_ls_weighting_scheme       calc  
_refine_ls_weighting_details 
 'calc w=1/[\s^2^(Fo^2^)+(0.0662P)^2^+1.0433P] where P=(Fo^2^+2Fc^2^)/3' 
_atom_sites_solution_primary      direct 
_atom_sites_solution_secondary    difmap 
_atom_sites_solution_hydrogens    geom 
_refine_ls_hydrogen_treatment     mixed 
_refine_ls_extinction_method      none 
_refine_ls_extinction_coef        ? 
_refine_ls_number_reflns          2533 
_refine_ls_number_parameters      306 
_refine_ls_number_restraints      0 
_refine_ls_R_factor_all           0.0452 
_refine_ls_R_factor_gt            0.0380 
_refine_ls_wR_factor_ref          0.1018 
_refine_ls_wR_factor_gt           0.0968 
_refine_ls_goodness_of_fit_ref    1.065 
_refine_ls_restrained_S_all       1.065 
_refine_ls_shift/su_max           0.001 
_refine_ls_shift/su_mean          0.000 
 
loop_ 
 _atom_site_label 
 _atom_site_type_symbol 
 _atom_site_fract_x 
 _atom_site_fract_y 
 _atom_site_fract_z 
 _atom_site_U_iso_or_equiv 
 _atom_site_adp_type 
 _atom_site_occupancy 
 _atom_site_symmetry_multiplicity 
 _atom_site_calc_flag 
 _atom_site_refinement_flags 
 _atom_site_disorder_assembly 
 _atom_site_disorder_group 
Br1 Br 0.72668(5) 1.08725(2) 0.737463(16) 0.0712(2) Uani 1 1 d . . . 
O2 O 0.9795(2) 0.82870(12) 0.55291(8) 0.0546(6) Uani 1 1 d . . . 
O1 O 0.7505(2) 0.78346(12) 0.56700(9) 0.0524(6) Uani 1 1 d . . . 
N1 N 0.9606(3) 0.72955(13) 0.46954(10) 0.0400(6) Uani 1 1 d . . . 
C1 C 0.8526(3) 0.83004(16) 0.57584(11) 0.0415(7) Uani 1 1 d . . . 
C2 C 0.8224(3) 0.89193(15) 0.61592(11) 0.0365(6) Uani 1 1 d . . . 
C3 C 0.9285(4) 0.94710(18) 0.62535(13) 0.0543(8) Uani 1 1 d . . . 
C4 C 0.9018(4) 1.00457(19) 0.66165(14) 0.0608(9) Uani 1 1 d . . . 
C5 C 0.7666(3) 1.00709(16) 0.68865(12) 0.0470(7) Uani 1 1 d . . . 
C6 C 0.6595(3) 0.95341(17) 0.68074(12) 0.0464(7) Uani 1 1 d . . . 
C7 C 0.6885(4) 0.89639(17) 0.64416(12) 0.0439(7) Uani 1 1 d . . . 
C9 C 0.9705(4) 0.77446(18) 0.33699(13) 0.0530(8) Uani 1 1 d . . . 
C10 C 0.9760(5) 0.7486(2) 0.28358(14) 0.0645(9) Uani 1 1 d . . . 
C11 C 0.8787(5) 0.6946(3) 0.26675(16) 0.0719(11) Uani 1 1 d . . . 
C12 C 0.7753(5) 0.6661(3) 0.30194(17) 0.0731(12) Uani 1 1 d . . . 
C13 C 0.7674(4) 0.6917(2) 0.35519(14) 0.0592(9) Uani 1 1 d . . . 
C14 C 0.8663(3) 0.74538(16) 0.37333(11) 0.0433(7) Uani 1 1 d . . . 
C15 C 0.8604(4) 0.7729(2) 0.43139(13) 0.0515(8) Uani 1 1 d . . . 
C16 C 0.9043(4) 0.65402(18) 0.48358(15) 0.0501(8) Uani 1 1 d . . . 
C17 C 1.0032(3) 0.61723(16) 0.52564(12) 0.0442(7) Uani 1 1 d . . . 
C18 C 1.1183(4) 0.56904(17) 0.51029(15) 0.0502(8) Uani 1 1 d . . . 
C19 C 1.2084(4) 0.53545(19) 0.54904(17) 0.0602(9) Uani 1 1 d . . . 
C20 C 1.1853(4) 0.5495(2) 0.60333(17) 0.0636(9) Uani 1 1 d . . . 
C21 C 1.0731(4) 0.5977(2) 0.61962(15) 0.0635(9) Uani 1 1 d . . . 
C22 C 0.9818(4) 0.6312(2) 0.58090(13) 0.0553(8) Uani 1 1 d . . . 
H1N1 H 0.970(3) 0.7578(17) 0.5014(13) 0.057(10) Uiso 1 1 d . . . 
H1N2 H 1.057(4) 0.7264(16) 0.4518(12) 0.051(8) Uiso 1 1 d . . . 
H3 H 1.019(4) 0.9447(18) 0.6050(13) 0.062(9) Uiso 1 1 d . . . 
H6 H 0.567(3) 0.9550(16) 0.6991(11) 0.049(8) Uiso 1 1 d . . . 
H7 H 0.623(3) 0.8615(18) 0.6393(11) 0.046(8) Uiso 1 1 d . . . 
H4 H 0.974(4) 1.040(2) 0.6679(13) 0.068(10) Uiso 1 1 d . . . 
H9 H 1.040(4) 0.807(2) 0.3511(13) 0.060(10) Uiso 1 1 d . . . 
H10 H 1.057(5) 0.772(2) 0.2606(16) 0.094(13) Uiso 1 1 d . . . 
H11 H 0.876(5) 0.673(2) 0.2347(17) 0.091(14) Uiso 1 1 d . . . 
H12 H 0.718(4) 0.633(3) 0.2940(18) 0.079(14) Uiso 1 1 d . . . 
H13 H 0.691(4) 0.6777(17) 0.3824(14) 0.057(9) Uiso 1 1 d . . . 
H15A H 0.901(4) 0.822(2) 0.4331(13) 0.062(10) Uiso 1 1 d . . . 
H15B H 0.763(4) 0.7700(19) 0.4445(13) 0.055(9) Uiso 1 1 d . . . 
H16A H 0.899(3) 0.623(2) 0.4528(14) 0.061(9) Uiso 1 1 d . . . 
H16B H 0.804(4) 0.6585(19) 0.4965(14) 0.065(10) Uiso 1 1 d . . . 
H18 H 1.130(3) 0.5588(15) 0.4758(12) 0.038(8) Uiso 1 1 d . . . 
H19 H 1.284(4) 0.504(2) 0.5341(16) 0.080(12) Uiso 1 1 d . . . 
H20 H 1.243(4) 0.529(2) 0.6288(17) 0.077(12) Uiso 1 1 d . . . 
H21 H 1.056(4) 0.6081(19) 0.6553(15) 0.064(10) Uiso 1 1 d . . . 
H22 H 0.908(4) 0.6599(16) 0.5919(12) 0.046(9) Uiso 1 1 d . . . 
 
loop_ 
 _atom_site_aniso_label 
 _atom_site_aniso_U_11 
 _atom_site_aniso_U_22 
 _atom_site_aniso_U_33 
 _atom_site_aniso_U_23 
 _atom_site_aniso_U_13 
 _atom_site_aniso_U_12 
Br1 0.0793(3) 0.0592(3) 0.0751(3) -0.03499(18) 0.00543(18) -0.00462(17) 
O2 0.0481(12) 0.0540(14) 0.0617(13) -0.0213(10) 0.0033(10) -0.0009(10) 
O1 0.0481(11) 0.0388(12) 0.0702(14) -0.0166(11) -0.0089(10) -0.0019(10) 
N1 0.0469(15) 0.0326(14) 0.0406(13) -0.0046(11) -0.0010(11) 0.0065(11) 
C1 0.0460(18) 0.0350(17) 0.0435(16) -0.0033(12) -0.0101(13) 0.0044(14) 
C2 0.0399(15) 0.0303(15) 0.0393(15) -0.0015(12) -0.0051(12) 0.0003(12) 
C3 0.0461(17) 0.046(2) 0.071(2) -0.0163(16) 0.0100(16) -0.0079(15) 
C4 0.0512(19) 0.048(2) 0.083(2) -0.0244(18) 0.0055(17) -0.0160(16) 
C5 0.0582(18) 0.0353(17) 0.0474(17) -0.0092(14) -0.0041(13) 0.0014(14) 
C6 0.0494(18) 0.0407(19) 0.0491(17) -0.0047(14) 0.0075(14) -0.0053(15) 
C7 0.0498(18) 0.0300(17) 0.0520(18) -0.0027(14) -0.0004(14) -0.0104(14) 
C9 0.066(2) 0.0354(18) 0.057(2) 0.0046(15) -0.0018(17) 0.0054(16) 
C10 0.082(2) 0.062(2) 0.050(2) 0.0133(18) 0.0082(19) 0.017(2) 
C11 0.086(3) 0.083(3) 0.047(2) -0.012(2) -0.012(2) 0.022(2) 
C12 0.069(2) 0.085(3) 0.065(3) -0.014(2) -0.017(2) -0.008(2) 
C13 0.0500(19) 0.072(3) 0.055(2) -0.0038(18) -0.0031(16) 0.0027(17) 
C14 0.0483(16) 0.0377(17) 0.0438(16) 0.0004(13) -0.0029(13) 0.0163(14) 
C15 0.062(2) 0.043(2) 0.0502(18) -0.0027(15) -0.0008(15) 0.0198(17) 
C16 0.053(2) 0.0416(19) 0.055(2) 0.0010(16) -0.0063(15) -0.0071(15) 
C17 0.0509(17) 0.0301(16) 0.0515(18) 0.0035(13) -0.0010(13) -0.0091(13) 
C18 0.061(2) 0.0361(18) 0.054(2) -0.0005(15) 0.0032(16) -0.0066(15) 
C19 0.057(2) 0.0371(19) 0.086(3) 0.0023(18) -0.0011(19) 0.0018(16) 
C20 0.066(2) 0.052(2) 0.073(3) 0.020(2) -0.012(2) -0.0045(18) 
C21 0.078(2) 0.064(2) 0.048(2) 0.0107(17) 0.0011(18) -0.002(2) 
C22 0.058(2) 0.049(2) 0.060(2) 0.0039(16) 0.0033(16) 0.0055(17) 
 
_geom_special_details 
; 
 All esds (except the esd in the dihedral angle between two l.s. planes) 
 are estimated using the full covariance matrix.  The cell esds are taken 
 into account individually in the estimation of esds in distances, angles 
 and torsion angles; correlations between esds in cell parameters are only 
 used when they are defined by crystal symmetry.  An approximate (isotropic) 
 treatment of cell esds is used for estimating esds involving l.s. planes. 
; 
 
loop_ 
 _geom_bond_atom_site_label_1 
 _geom_bond_atom_site_label_2 
 _geom_bond_distance 
 _geom_bond_site_symmetry_2 
 _geom_bond_publ_flag 
Br1 C5 1.898(3) . ? 
O2 O2 0.000(7) 1 ? 
O2 C1 1.258(3) . ? 
O1 O1 0.000(6) 1 ? 
O1 C1 1.250(3) . ? 
N1 C16 1.482(4) . ? 
N1 C15 1.503(4) . ? 
N1 H1N1 0.93(3) . ? 
N1 H1N2 0.96(3) . ? 
C1 O1 1.250(3) 1 ? 
C1 O2 1.258(3) 1 ? 
C1 C2 1.502(4) . ? 
C2 C7 1.376(4) . ? 
C2 C3 1.384(4) . ? 
C3 C4 1.378(4) . ? 
C3 H3 0.95(3) . ? 
C4 C5 1.370(4) . ? 
C4 H4 0.91(4) . ? 
C5 C6 1.366(4) . ? 
C6 C7 1.380(4) . ? 
C6 H6 0.93(3) . ? 
C7 H7 0.86(3) . ? 
C9 C14 1.383(4) . ? 
C9 C10 1.384(5) . ? 
C9 H9 0.91(3) . ? 
C10 C11 1.360(6) . ? 
C10 H10 1.00(4) . ? 
C11 C12 1.357(6) . ? 
C11 H11 0.87(4) . ? 
C12 C13 1.380(5) . ? 
C12 H12 0.81(4) . ? 
C13 C14 1.374(5) . ? 
C13 H13 0.98(3) . ? 
C14 C15 1.501(4) . ? 
C15 H15A 0.94(4) . ? 
C15 H15B 0.92(3) . ? 
C16 C17 1.503(4) . ? 
C16 H16A 0.93(4) . ? 
C16 H16B 0.94(4) . ? 
C17 C22 1.385(4) . ? 
C17 C18 1.388(4) . ? 
C18 C19 1.377(5) . ? 
C18 H18 0.87(3) . ? 
C19 C20 1.364(5) . ? 
C19 H19 0.95(4) . ? 
C20 C21 1.377(5) . ? 
C20 H20 0.88(4) . ? 
C21 C22 1.382(5) . ? 
C21 H21 0.90(3) . ? 
C22 H22 0.88(3) . ? 
 
loop_ 
 _geom_angle_atom_site_label_1 
 _geom_angle_atom_site_label_2 
 _geom_angle_atom_site_label_3 
 _geom_angle 
 _geom_angle_site_symmetry_1 
 _geom_angle_site_symmetry_3 
 _geom_angle_publ_flag 
O2 O2 C1 0(10) 1 . ? 
O1 O1 C1 0(10) 1 . ? 
C16 N1 C15 114.5(3) . . ? 
C16 N1 H1N1 109.5(19) . . ? 
C15 N1 H1N1 107.0(19) . . ? 
C16 N1 H1N2 110.6(17) . . ? 
C15 N1 H1N2 106.1(17) . . ? 
H1N1 N1 H1N2 109(3) . . ? 
O1 C1 O1 0.0(3) 1 . ? 
O1 C1 O2 124.0(3) 1 . ? 
O1 C1 O2 124.0(3) . . ? 
O1 C1 O2 124.0(3) 1 1 ? 
O1 C1 O2 124.0(3) . 1 ? 
O2 C1 O2 0.0(2) . 1 ? 
O1 C1 C2 118.4(3) 1 . ? 
O1 C1 C2 118.4(3) . . ? 
O2 C1 C2 117.6(2) . . ? 
O2 C1 C2 117.6(2) 1 . ? 
C7 C2 C3 117.6(3) . . ? 
C7 C2 C1 121.5(2) . . ? 
C3 C2 C1 120.9(3) . . ? 
C4 C3 C2 121.5(3) . . ? 
C4 C3 H3 121(2) . . ? 
C2 C3 H3 117(2) . . ? 
C5 C4 C3 119.0(3) . . ? 
C5 C4 H4 121(2) . . ? 
C3 C4 H4 120(2) . . ? 
C6 C5 C4 121.3(3) . . ? 
C6 C5 Br1 119.4(2) . . ? 
C4 C5 Br1 119.4(2) . . ? 
C5 C6 C7 118.8(3) . . ? 
C5 C6 H6 121.5(18) . . ? 
C7 C6 H6 119.7(18) . . ? 
C2 C7 C6 121.9(3) . . ? 
C2 C7 H7 118.3(19) . . ? 
C6 C7 H7 119.8(19) . . ? 
C14 C9 C10 120.1(4) . . ? 
C14 C9 H9 116(2) . . ? 
C10 C9 H9 123(2) . . ? 
C11 C10 C9 120.0(4) . . ? 
C11 C10 H10 125(2) . . ? 
C9 C10 H10 114(2) . . ? 
C12 C11 C10 120.3(4) . . ? 
C12 C11 H11 112(3) . . ? 
C10 C11 H11 127(3) . . ? 
C11 C12 C13 120.4(4) . . ? 
C11 C12 H12 124(3) . . ? 
C13 C12 H12 116(3) . . ? 
C14 C13 C12 120.2(4) . . ? 
C14 C13 H13 113.8(19) . . ? 
C12 C13 H13 125.9(19) . . ? 
C13 C14 C9 118.9(3) . . ? 
C13 C14 C15 120.7(3) . . ? 
C9 C14 C15 120.4(3) . . ? 
C14 C15 N1 113.3(2) . . ? 
C14 C15 H15A 109(2) . . ? 
N1 C15 H15A 103(2) . . ? 
C14 C15 H15B 110(2) . . ? 
N1 C15 H15B 108(2) . . ? 
H15A C15 H15B 113(3) . . ? 
N1 C16 C17 111.1(2) . . ? 
N1 C16 H16A 112(2) . . ? 
C17 C16 H16A 109(2) . . ? 
N1 C16 H16B 109(2) . . ? 
C17 C16 H16B 111(2) . . ? 
H16A C16 H16B 106(3) . . ? 
C22 C17 C18 118.4(3) . . ? 
C22 C17 C16 120.4(3) . . ? 
C18 C17 C16 121.2(3) . . ? 
C19 C18 C17 120.9(3) . . ? 
C19 C18 H18 120.5(19) . . ? 
C17 C18 H18 118.6(18) . . ? 
C20 C19 C18 120.0(4) . . ? 
C20 C19 H19 126(2) . . ? 
C18 C19 H19 114(2) . . ? 
C19 C20 C21 120.3(4) . . ? 
C19 C20 H20 121(3) . . ? 
C21 C20 H20 119(3) . . ? 
C20 C21 C22 119.9(4) . . ? 
C20 C21 H21 122(2) . . ? 
C22 C21 H21 118(2) . . ? 
C21 C22 C17 120.5(3) . . ? 
C21 C22 H22 118.9(19) . . ? 
C17 C22 H22 120.5(19) . . ? 
 
loop_ 
 _geom_hbond_atom_site_label_D 
 _geom_hbond_atom_site_label_H 
 _geom_hbond_atom_site_label_A 
 _geom_hbond_distance_DH 
 _geom_hbond_distance_HA 
 _geom_hbond_distance_DA 
 _geom_hbond_angle_DHA 
 _geom_hbond_site_symmetry_A 
N1 H1N1 O2  0.93(3) 1.79(3) 2.705(3) 168(3) 1 
N1 H1N1 O1  0.93(3) 2.57(3) 3.173(3) 123(2) 1 
N1 H1N2 O1  0.96(3) 1.79(3) 2.733(3) 168(3) 4_566 
 
_diffrn_measured_fraction_theta_max    0.998 
_diffrn_reflns_theta_full              22.50 
_diffrn_measured_fraction_theta_full   0.998 
_refine_diff_density_max    0.272 
_refine_diff_density_min   -0.575 
_refine_diff_density_rms    0.075 
